# Supplementary material for: Assessment of the Effectiveness of a Portable NIRS Instrument in Controlling the Mixer Wagon Tuning and Ration Management
Source: MDPI journal article supplement (doi:10.3390/ani11123566), 2021-12-15
Supplement: s1 [file s1]

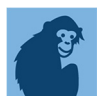

Supplementary materials

Figure S1: Farms location in the Pianura Padana Veneta country. Dati cartografici ©2021 Google, GeoBasis-DE/BKG (©2009)

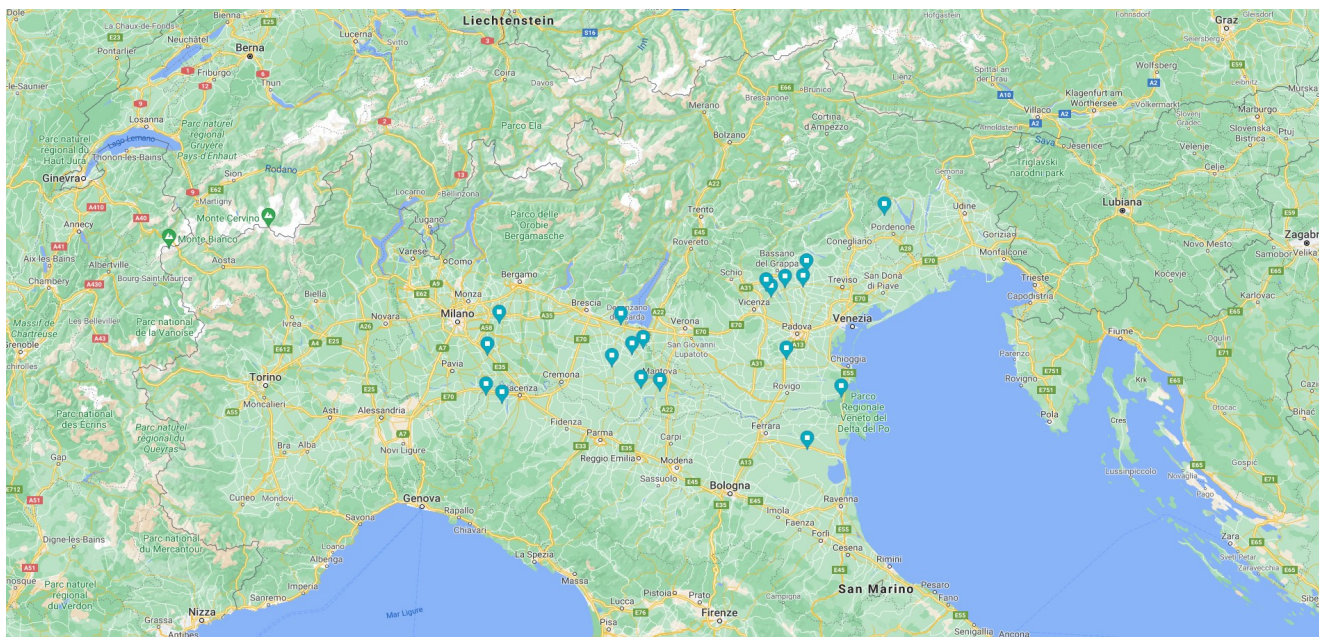

**Figure S2:** A schematic flowchart of the entire trials procedures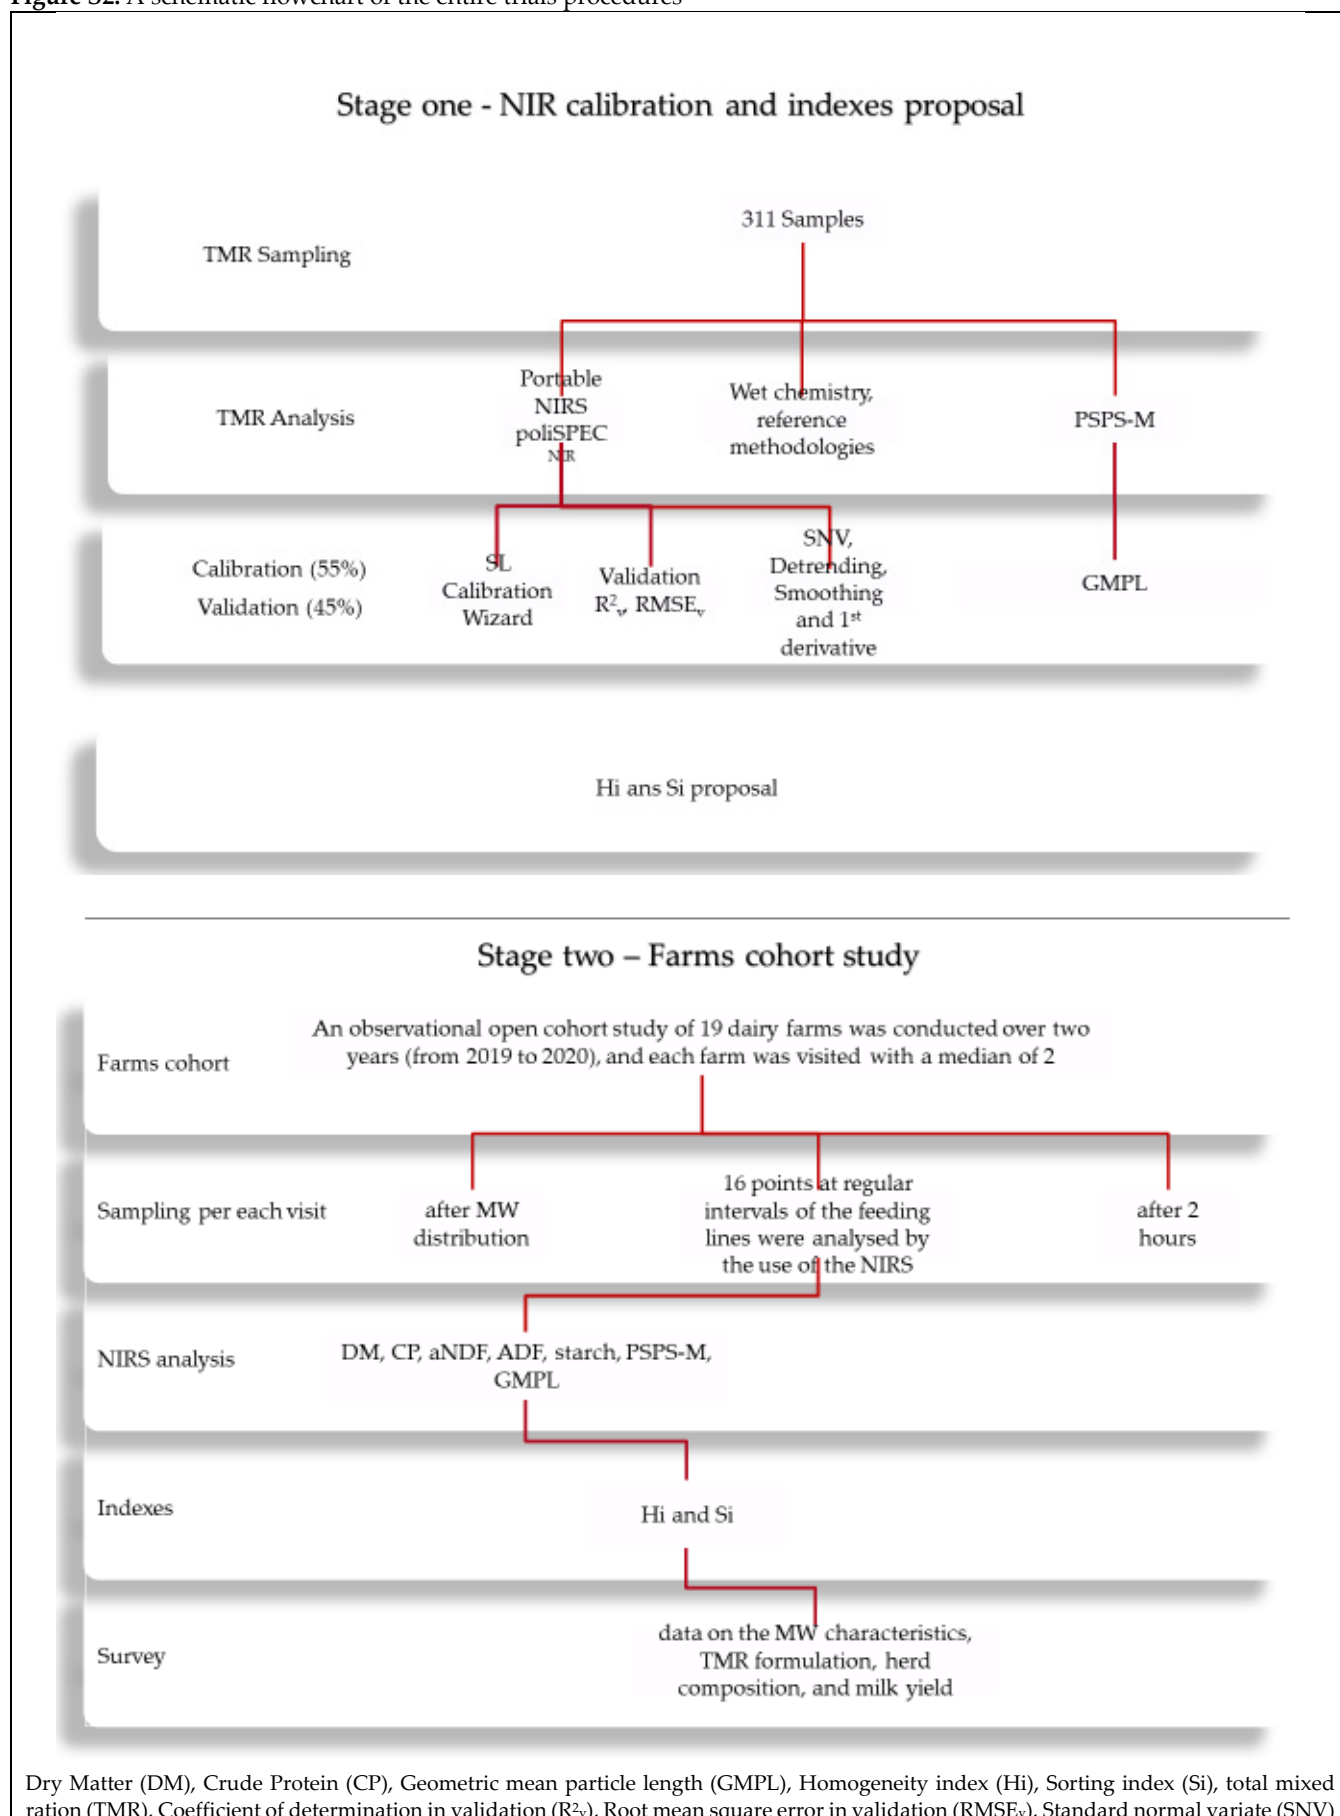

**Table S1:** Coordinates, contributes, and  $\cos^2$ , for individual variables used to perform the PCA and supplementary categories for the 19 farms studied in the cohort.

| Variables                |       |      |        |       |       |        |       |      |        |       |      |        |       |      |        |      |
|--------------------------|-------|------|--------|-------|-------|--------|-------|------|--------|-------|------|--------|-------|------|--------|------|
|                          | Dim.1 | ctr  | cos2   | Dim.2 | ctr   | cos2   | Dim.3 | ctr  | cos2   | Dim.4 | ctr  | cos2   | Dim.5 | ctr  | cos2   |      |
| MW.augers.n              | 0.48  | 6.08 | 0.23   | 0.14  | 0.61  | 0.02   | 0.54  | 13.9 | 0.29   | -0.60 | 25.8 | 0.36   | 0.11  | 1.13 | 0.01   |      |
| MW.volume (m³)           | 0.28  | 2.11 | 0.08   | 0.24  | 1.90  | 0.06   | 0.68  | 22.5 | 0.47   | -0.51 | 19.1 | 0.26   | 0.05  | 0.25 | 0.00   |      |
| MW.total.time (sec)      | 0.72  | 14.1 | 0.52   | -0.27 | 2.46  | 0.08   | 0.02  | 0.02 | 0.00   | 0.13  | 1.13 | 0.02   | -0.36 | 11.4 | 0.13   |      |
| Hi                       | -0.08 | 0.17 | 0.01   | -0.72 | 17.2  | 0.52   | 0.27  | 3.57 | 0.07   | 0.11  | 0.88 | 0.01   | 0.39  | 13.2 | 0.15   |      |
| Si                       | 0.69  | 13.0 | 0.48   | 0.28  | 2.65  | 0.08   | -0.17 | 1.30 | 0.03   | 0.37  | 9.98 | 0.14   | 0.19  | 3.10 | 0.04   |      |
| GMPL (mm)                | 0.25  | 1.62 | 0.06   | 0.74  | 18.2  | 0.55   | -0.10 | 0.52 | 0.01   | 0.02  | 0.02 | 0.00   | 0.32  | 9.04 | 0.10   |      |
| milk.yield.farm (kg/day) | 0.17  | 0.81 | 0.03   | -0.29 | 2.85  | 0.09   | 0.67  | 21.4 | 0.45   | 0.45  | 14.6 | 0.20   | 0.00  | 0.00 | 0.00   |      |
| mixer.wagon.fullness (%) | 0.12  | 0.35 | 0.01   | 0.41  | 5.40  | 0.16   | 0.39  | 7.37 | 0.15   | 0.24  | 4.05 | 0.06   | -0.65 | 36.9 | 0.42   |      |
| DMI (Kg of the DM/day)   | 0.64  | 11.0 | 0.41   | -0.15 | 0.74  | 0.02   | 0.49  | 11.7 | 0.24   | 0.33  | 7.78 | 0.11   | 0.06  | 0.27 | 0.00   |      |
| DM (%)                   | 0.10  | 0.25 | 0.01   | -0.88 | 25.6  | 0.78   | -0.01 | 0.01 | 0.00   | 0.01  | 0.00 | 0.00   | 0.19  | 3.18 | 0.04   |      |
| aNDF (% of the DM)       | 0.78  | 16.5 | 0.61   | 0.30  | 3.00  | 0.09   | -0.36 | 6.18 | 0.13   | -0.07 | 0.35 | 0.01   | -0.02 | 0.04 | 0.00   |      |
| CP (% of the DM)         | -0.72 | 13.9 | 0.52   | 0.40  | 5.31  | 0.16   | 0.40  | 7.52 | 0.16   | 0.02  | 0.02 | 0.00   | 0.15  | 2.05 | 0.02   |      |
| Starch (% of the DM)     | -0.78 | 16.4 | 0.61   | -0.13 | 0.59  | 0.02   | 0.15  | 1.06 | 0.02   | -0.01 | 0.01 | 0.00   | -0.35 | 10.9 | 0.12   |      |
| peNDF (% of the DM)      | -0.37 | 3.65 | 0.14   | 0.64  | 13.53 | 0.41   | 0.25  | 3.02 | 0.06   | 0.47  | 16.2 | 0.22   | 0.31  | 8.48 | 0.10   |      |
| Supplementary categories |       |      |        |       |       |        |       |      |        |       |      |        |       |      |        |      |
|                          | Dim.1 | cos2 | v.test | Dim.2 | cos2  | v.test | Dim.3 | cos2 | v.test | Dim.4 | cos2 | v.test | Dim.5 | cos2 | v.test | Dist |
| MW self-propelled        | -0.28 | 0.41 | -1.20  | 0.03  | 0.00  | 0.14   | -0.06 | 0.02 | -0.35  | -0.15 | 0.12 | -1.06  | 0.16  | 0.13 | 1.20   | 0.44 |
| MW towed                 | 1.05  | 0.41 | 1.20   | -0.11 | 0.00  | -0.14  | 0.23  | 0.02 | 0.35   | 0.57  | 0.12 | 1.06   | -0.58 | 0.13 | -1.20  | 1.63 |
| Hbhi                     | -0.36 | 0.08 | -0.74  | -1.04 | 0.67  | -2.40  | 0.26  | 0.04 | 0.73   | 0.01  | 0.00 | 0.02   | 0.43  | 0.11 | 1.61   | 1.27 |
| Ibhi                     | 0.34  | 0.07 | 0.70   | 1.03  | 0.66  | 2.38   | -0.30 | 0.05 | -0.82  | 0.04  | 0.00 | 0.12   | -0.44 | 0.12 | -1.64  | 1.27 |
| ESbsi                    | 1.19  | 0.62 | 2.24   | 0.61  | 0.16  | 1.27   | -0.38 | 0.06 | -0.96  | 0.33  | 0.05 | 1.01   | 0.36  | 0.06 | 1.23   | 1.51 |
| NSbsi                    | -1.31 | 0.76 | -2.73  | -0.60 | 0.16  | -1.39  | 0.10  | 0.01 | 0.29   | -0.27 | 0.03 | -0.94  | 0.04  | 0.00 | 0.16   | 1.50 |
| FMY-low (kg/day)         | -0.27 | 0.05 | -0.56  | 0.04  | 0.00  | 0.08   | -0.95 | 0.63 | -2.65  | -0.62 | 0.27 | -2.12  | -0.16 | 0.02 | -0.59  | 1.19 |
| FMY-High (kg/day)        | 0.25  | 0.04 | 0.52   | -0.04 | 0.00  | -0.10  | 0.92  | 0.60 | 2.56   | 0.66  | 0.31 | 2.26   | 0.15  | 0.02 | 0.56   | 1.18 |

DM, dry matter of the TMR; CP, crude protein of the TMR; Hi, homogeneity index, Si, sorting index; GMPL, geometric mean of the particle size (mm); Ibhi (Inhomogeneous Hi  $\leq 79\%$ ); Hbhi (homogeneous); NSbsi (negligible selection Si  $\leq 0.30$ ); ESbsi (evident selection, Si  $> 0.30$ ); FMY-low: Farm milk yield  $< 35$  kg/day; FMY-high: Farm milk yield  $\geq 35$  kg/day; MW, mixer wagon set.
